# Supplementary material for: Experimental and theoretical investigation of the tuning of electronic structure in SnO2viaCo doping for enhanced styrene epoxidation catalysis
Source: Royal Society of Chemistry journal article supplement (doi:10.1039/d1cy01982a), 2022-01-01
Supplement: d1cy01982a1.pdf [file d1cy01982a1.pdf]

## Supplementary material

### **Experimental and theoretical investigation of the tuning of electronic structure in SnO<sub>2</sub> via Co doping for enhanced styrene epoxidation catalysis**

Jiangyong Liu <sup>a,\*</sup>, Xinyang Ji <sup>a</sup>, Jie Shi <sup>b</sup>, Lixia Wang <sup>a</sup>, Panming Jian <sup>a</sup>, Xiaodong Yan <sup>c</sup>, Dan Wang <sup>b</sup>

<sup>a</sup> *School of Chemistry and Chemical Engineering, Yangzhou University, Yangzhou, Jiangsu 225002, China*

<sup>b</sup> *State Key Laboratory of Organic-Inorganic Composites, Beijing University of Chemical Technology, Beijing 100029, China*

<sup>c</sup> *School of Chemical and Material Engineering, Jiangnan University, Wuxi 214122, China*

\* Corresponding author: liujy@yzu.edu.cn (J. Liu)

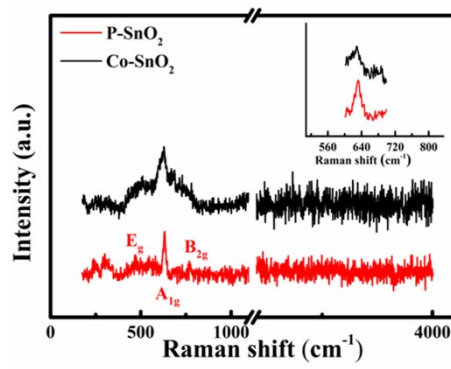

**Fig. S1.** Raman spectra of the samples.

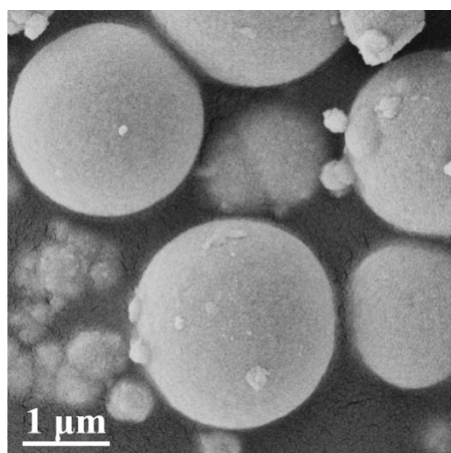

**Fig. S2.** SEM image of the P-SnO<sub>2</sub>.

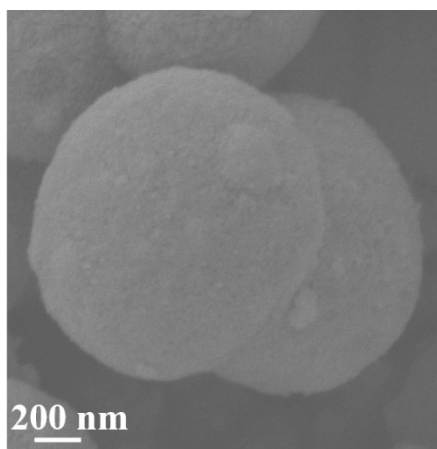

**Fig. S3.** SEM image of the Co-SnO<sub>2</sub>.

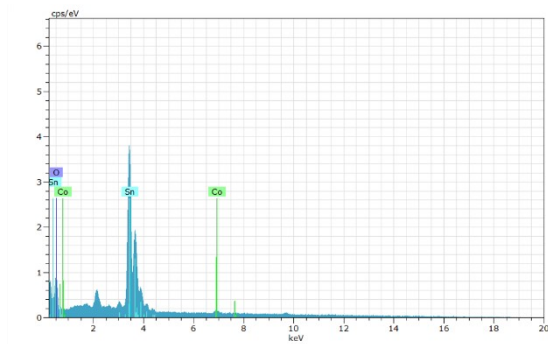

**Fig. S4.** EDS analysis of the elemental content in the Co-SnO<sub>2</sub>.

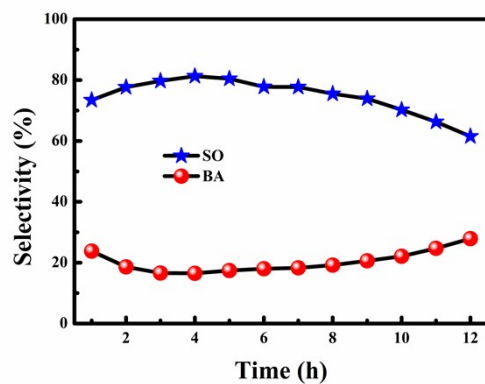

**Fig. S5.** The selectivity of SO and BA (benzaldehyde) in the SER reaction catalyzed by the Co-SnO<sub>2</sub>. Reaction conditions: 0.1 g of Co-SnO<sub>2</sub>, 15 mmol of styrene, 0.7 mol of acetonitrile, 45 mmol of TBHP, 80 °C, 12 h.

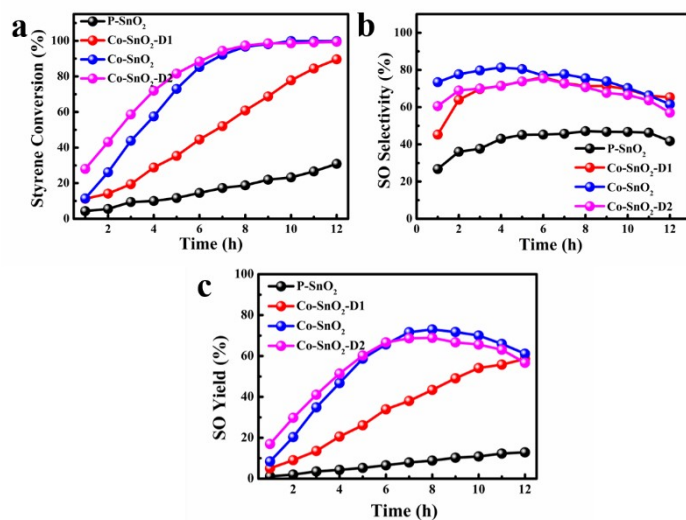

**Fig. S6.** Evaluation of the SER performance catalyzed by the Co doped SnO<sub>2</sub> catalysts with different Co doping contents. Co-SnO<sub>2</sub>-D1, Co-SnO<sub>2</sub> and Co-SnO<sub>2</sub>-D2 are the catalysts with Co doping content of 1.0 wt.%, 2.0 wt.% and 3.0 wt.%, respectively. Reaction conditions: 0.1 g of catalyst, 15 mmol of styrene, 0.7 mol of acetonitrile, 45 mmol of TBHP, 80 °C, 12 h.

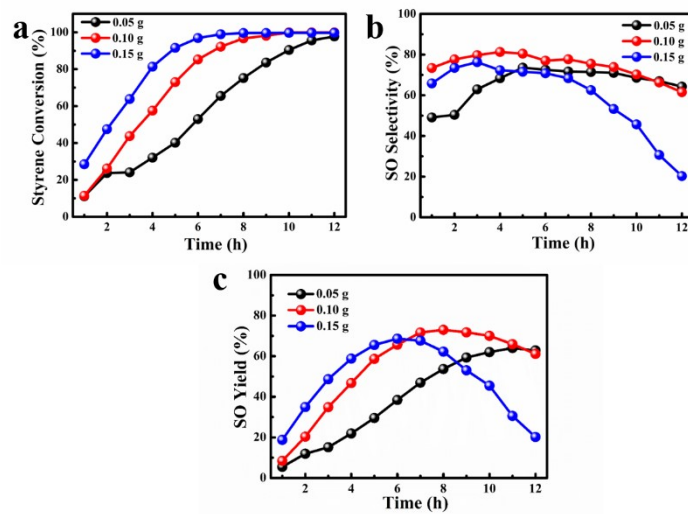

**Fig. S7.** Evaluation of the SER performance catalyzed by the Co-SnO<sub>2</sub> with different catalyst dosages. Reaction conditions: 15 mmol of styrene, 0.7 mol of acetonitrile, 45 mmol of TBHP, 80 °C, 12 h.



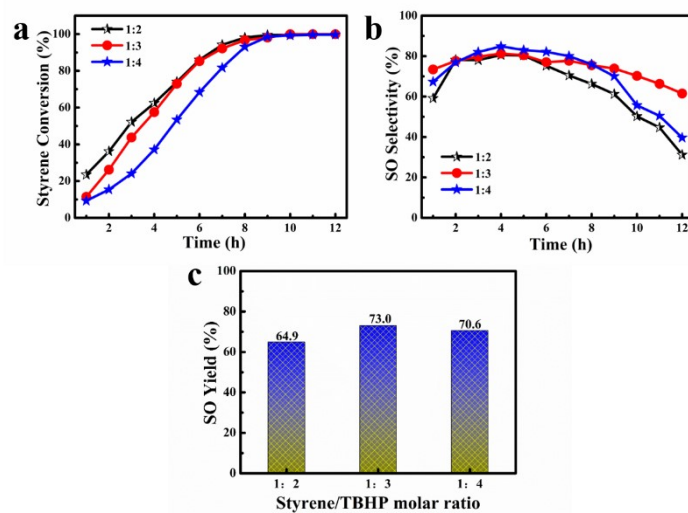

**Fig. S8.** Evaluation of the SER performance catalyzed by the Co-SnO<sub>2</sub> with different styrene/TBHP molar ratios. Reaction conditions: 0.1 g of catalyst, 15 mmol of styrene, 0.7 mol of acetonitrile, 80 °C, 12 h.

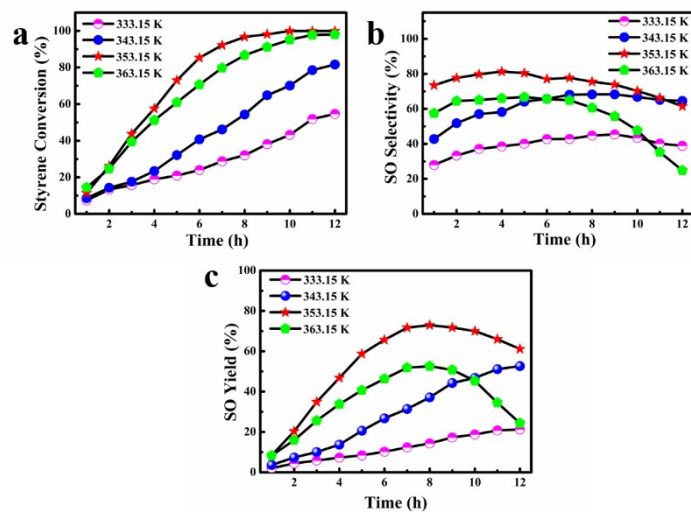

**Fig. S9.** Evaluation of the SER performance catalyzed by the Co-SnO<sub>2</sub> with different reaction temperatures. Reaction conditions: 0.1 g of catalyst, 15 mmol of styrene, 0.7 mol of acetonitrile, 45 mmol of TBHP, 12 h.

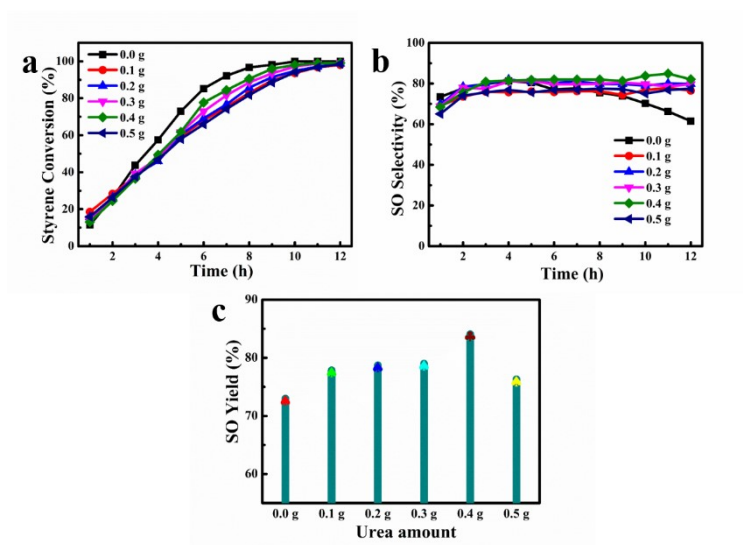

**Fig. S10.** Evaluation of the SER performance catalyzed by the Co-SnO<sub>2</sub> with the involvement of different amount of urea. Reaction conditions: 0.1 g of catalyst, 15 mmol of styrene, 0.7 mol of acetonitrile, 45 mmol of TBHP, different amount of urea, 80 °C, 12 h.

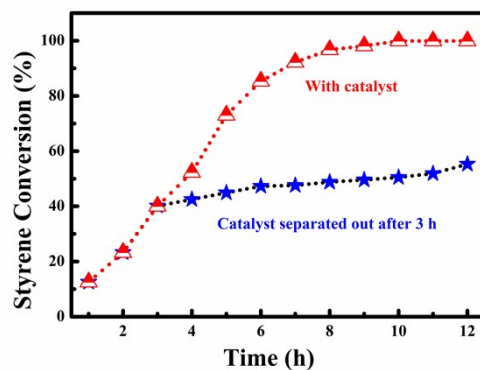

**Fig. S11.** The hot filtrate test of the Co-SnO<sub>2</sub> in the SER. Reaction conditions: 0.1 g of catalyst, 15 mmol of styrene, 0.7 mol of acetonitrile, 45 mmol of TBHP, 80 °C, 12 h.

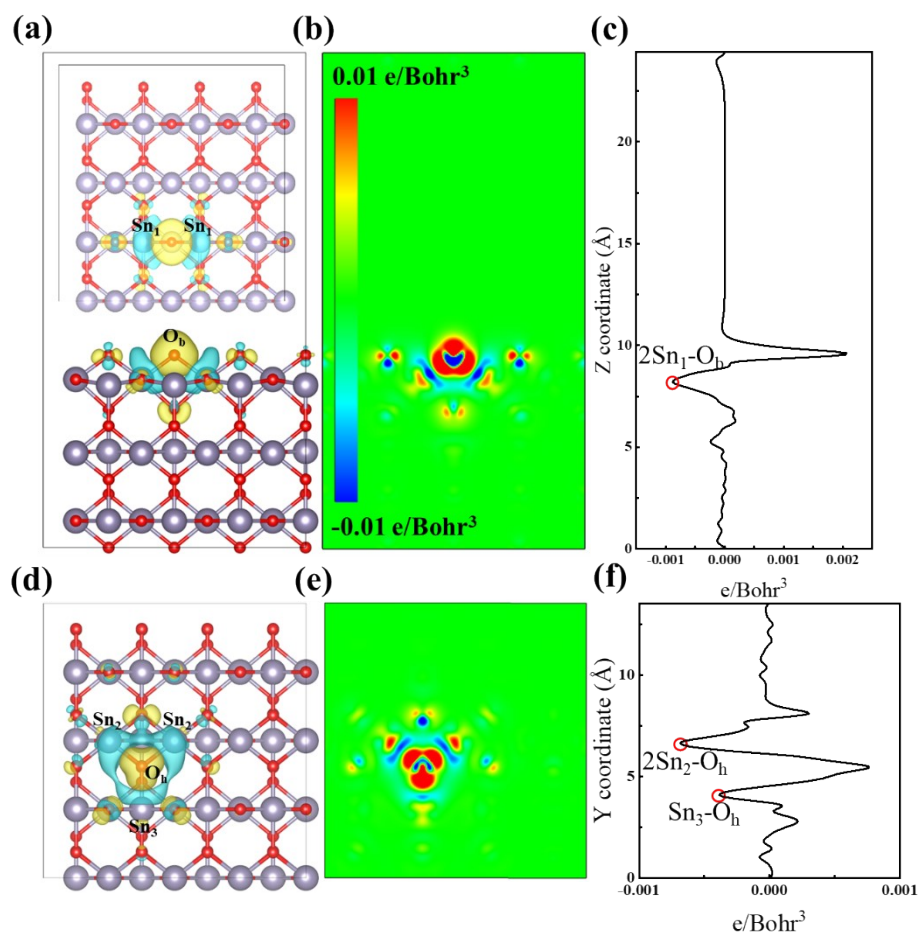

**Fig. S12.** The Charge Density Difference (CDD) (a, d), the corresponding 2D slices (b, e) and the distribution of CDD along the Z direction (c, f) of SnO<sub>2</sub> (110) surface with and without the O<sub>b</sub>/O<sub>h</sub> atom (i.e. without and with the OV<sub>bridge</sub>/OV<sub>hollow</sub>). The silver and red balls represents Sn and O atoms, respectively. In (a, d), the cyan area indicates the decrease of electron density, and the yellow indicates the increase of electron density. In the corresponding diagrams (b-c & e-f), the negative value means electrons transfer out, and the positive value means electrons capture.

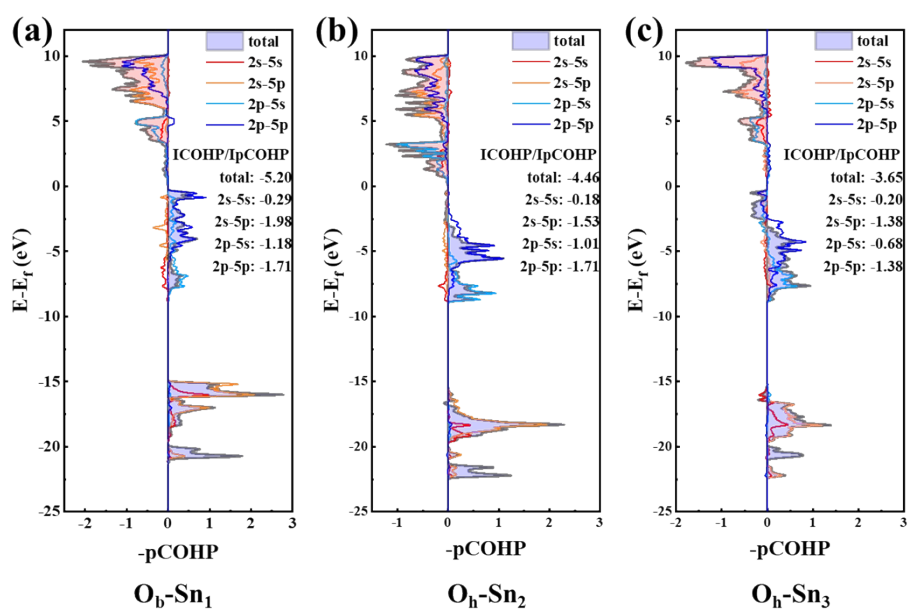

**Fig. S13.** The Crystal Orbital Hamilton Populations (COHP) and the integration of COHP (ICOHP) for the bonds of (a)  $O_b-Sn_1$ , (b)  $O_h-Sn_2$  and (c)  $O_h-Sn_3$  on  $SnO_2$  (110) surface.

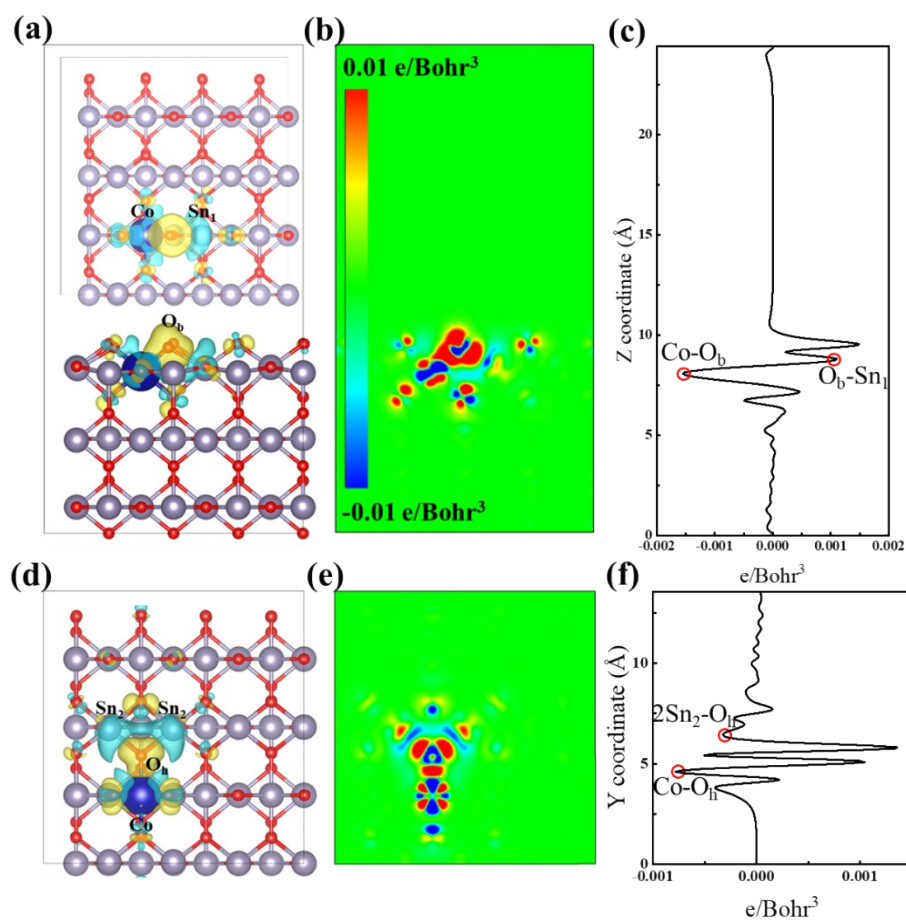

**Fig. S14.** The Charge Density Difference (CDD) (a, d), the corresponding 2D slices (b, e) and the distribution of CDD along the Z direction (c, f) of Co-<sub>1</sub>-SnO<sub>2</sub> (110) surface with and without the O<sub>b</sub>/O<sub>h</sub> atom (i.e. without and with the OV<sub>bridge</sub>/OV<sub>hollow</sub>). The silver, blue and red balls represents Sn, Co and O atoms, respectively.

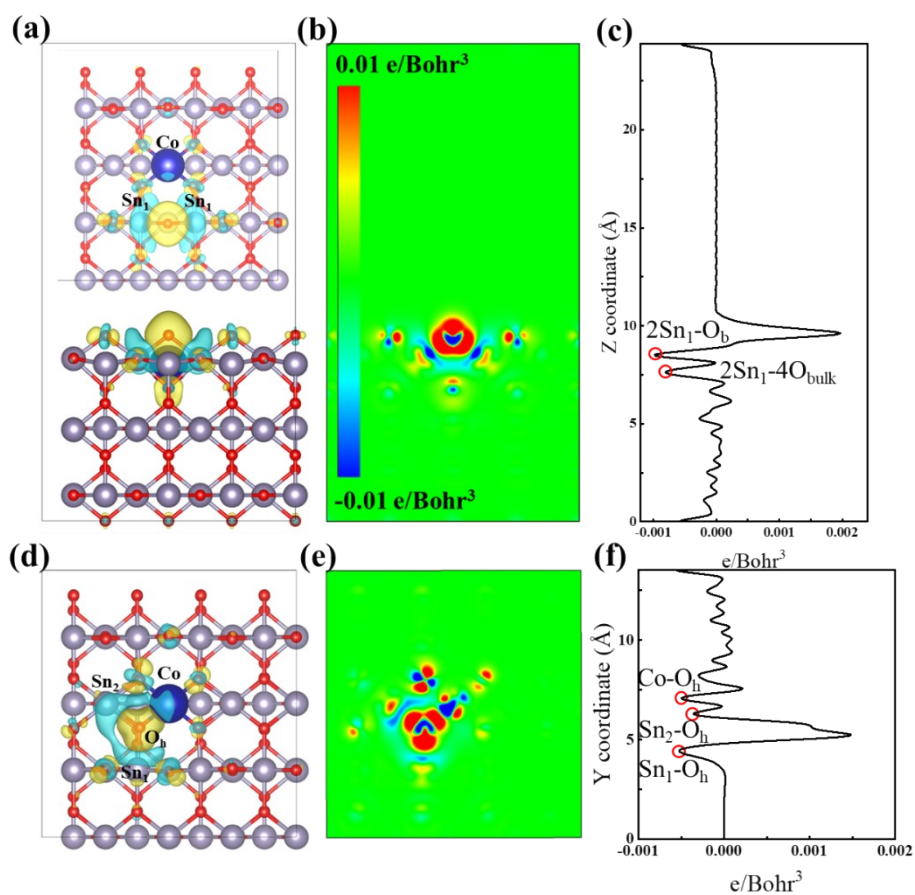

**Fig. S15.** The Charge Density Difference (CDD) (a, d), the corresponding 2D slices (b, e) and the distribution of CDD along the Z direction (e, f) of  $\text{Co}_2\text{-SnO}_2$  (110) surface with and without the  $\text{O}_b/\text{O}_h$  atom (i.e. without and with the  $\text{OV}_{\text{bridge}}/\text{OV}_{\text{hollow}}$ ). The silver, blue and red balls represents Sn, Co and O atoms, respectively.



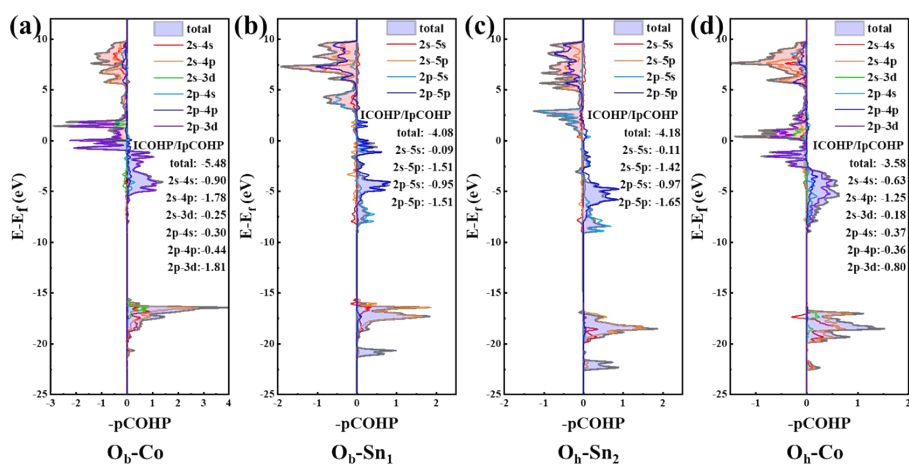

**Fig. S16.** The Crystal Orbital Hamilton Populations (COHP) and the integration of COHP (ICOHP) for the bonds of (a)  $O_b$ -Co, (b)  $O_b$ -Sn<sub>1</sub>, (c)  $O_h$ -Sn<sub>2</sub> and (d)  $O_h$ -Co on  $Co_1$ -SnO<sub>2</sub> (110) surface.

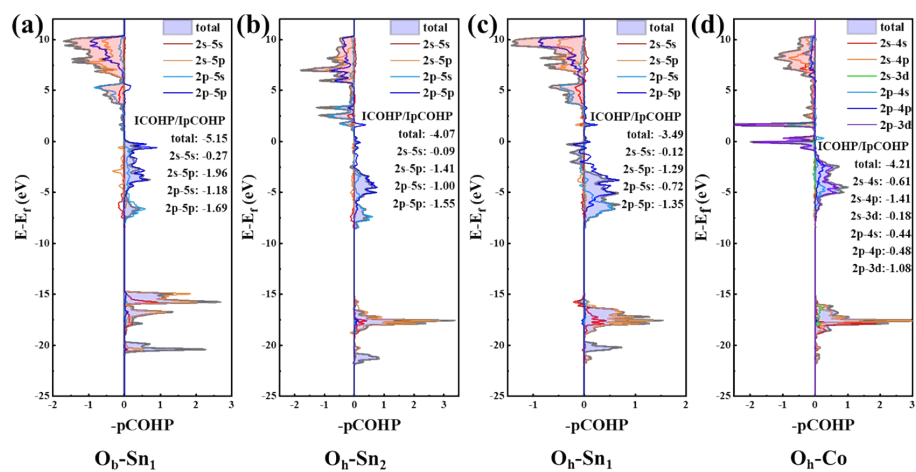

**Fig. S17.** The Crystal Orbital Hamilton Populations (COHP) and the integration of COHP (ICOHP) for the bonds of (a)  $O_b-Sn_1$ , (b)  $O_h-Sn_2$ , (c)  $O_h-Sn_1$  and (d)  $O_h-Co$  on  $Co_2-SnO_2$  (110) surface.

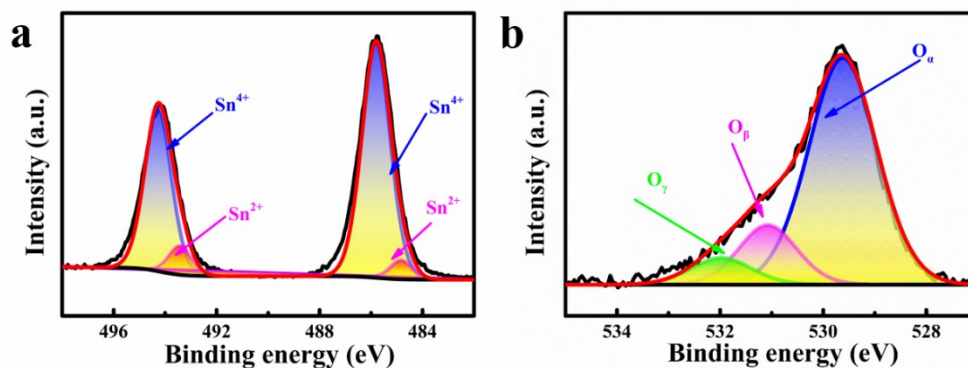

**Fig. S18.** XPS detection results for the TBHP treated Co-SnO<sub>2</sub> (TT-Co-SnO<sub>2</sub>): high-resolution XPS Sn 3d (a) and O 1s (b) spectra. For the treatment, 0.1 g of Co-SnO<sub>2</sub> was dispersed in 45 mmol of TBHP, followed by treating at 80 °C for 12 h. After that, the catalyst was collected by centrifugation and washed with ethanol for several times and dried at 60 °C for 12 h. The obtained TT-Co-SnO<sub>2</sub> catalyst was then characterized by the XPS test.
